# Supplementary material
Source: publisher site journal article supplement (https://www.spandidos-publications.com/1207/downloadSupplementary)

Figure S1. Silencing FGFR4 expression in colorectal cancer cell line SW620 by construction and selection of lentiviral vectors. (A) pGL3 vectors containing specific shRNAs (LV3-497, LV3-1679, LV3-1750 and LV3-2074) for FGFR4 and a control shRNA (LV3NC). (B) Transfection efficiency of lentivirus was observed by fluorescence microscopy at 72 h post-transfection. (C) Expression of FGFR4 in SW620 was detected by western blotting following transfection with four specific FGFR4 shRNAs and LV3NC.  $\beta$ -actin was used as an internal control. FGFR4, fibroblast growth factor receptor 4; NC, negative control; shRNA, short hairpin RNA; CRC, colorectal cancer.

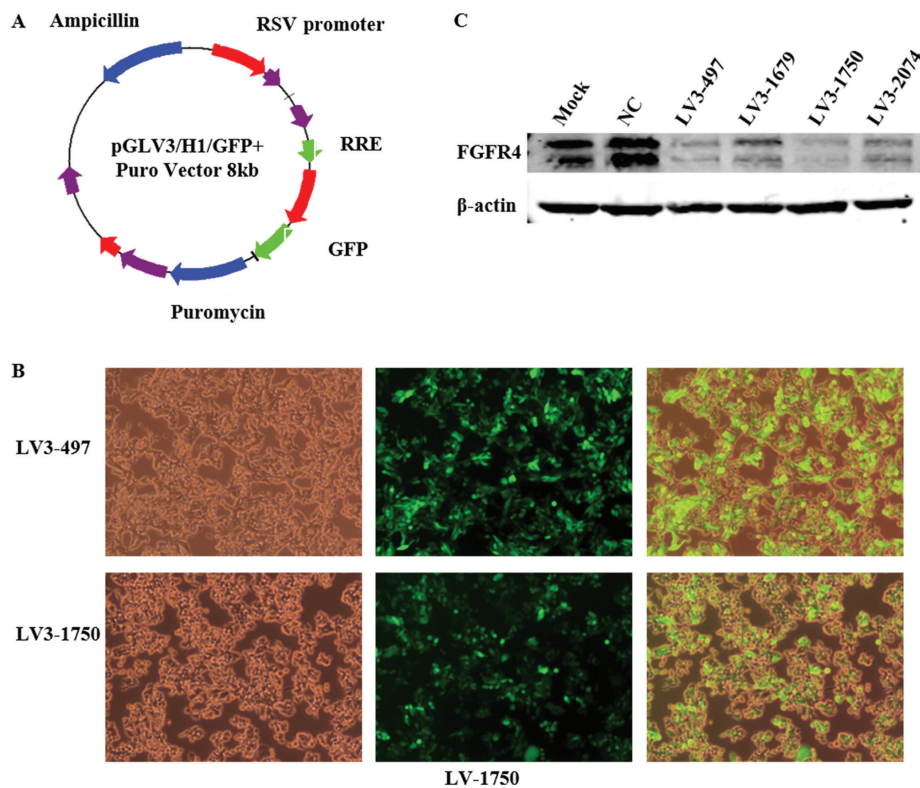

Supplement: Supplementary file 1 [file downloadSupplementary]
